# Supplementary material
Source: publisher figshare collection journal article supplement (https://karger.figshare.com/ndownloader/files/15234983)
Supplement: Supplementary file 1 [file 15234983]

**Supplementary Fig. 1.** Physiologically active concentrations of **(A)** neurotransmitters and **(B)** neurotrophins were determined by their ability to stimulate acetylcholine release. GABA, a neurotransmitter inhibitor of acetylcholine released was used as a negative control. (n=1).

***
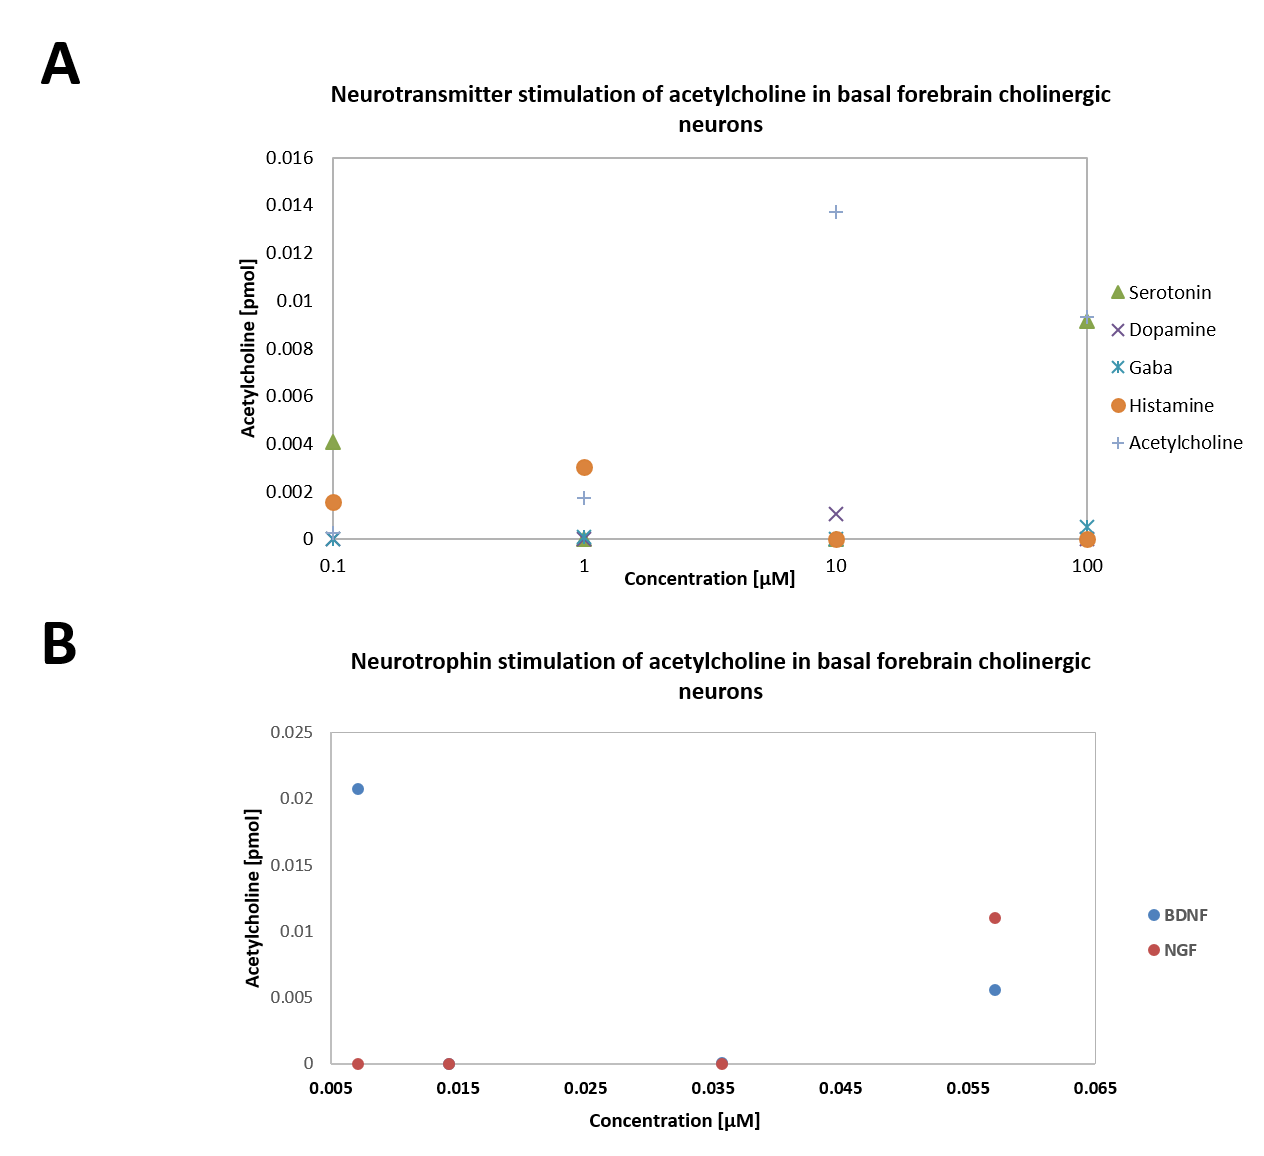
***
